# Supplementary material
Source: PubMed Central journal article supplement (PMC3791681)

*Sema3a*<sup>+</sup>

- dox

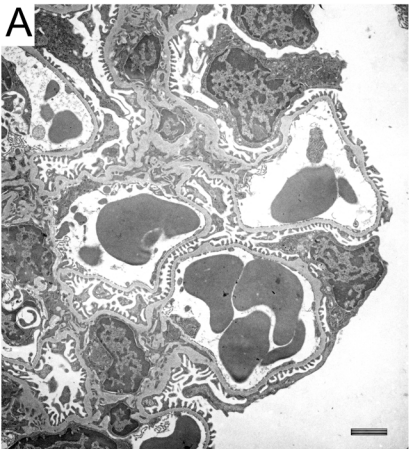

+ dox

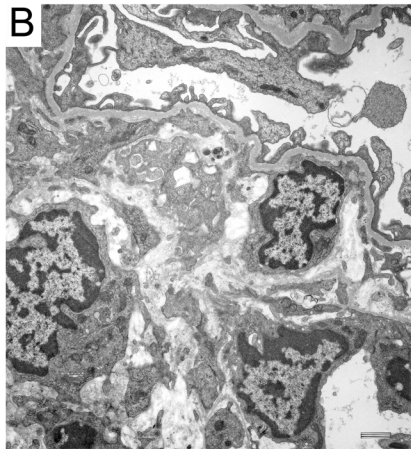

+/- dox

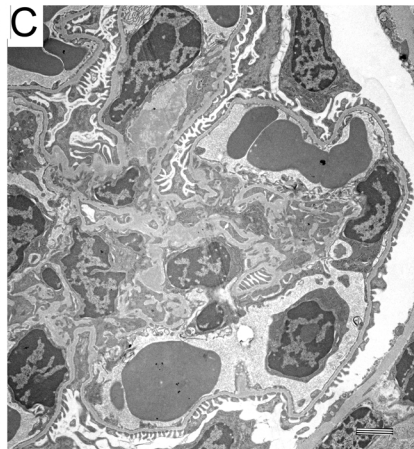

Supplement: mmc1.pdf [file mmc1.pdf]

# Sema3a<sup>+</sup> podocytes

nephrin

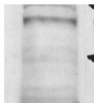

sema3a

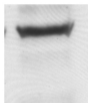

WT1

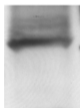

neuropilin1

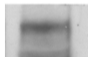

podocin

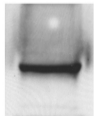

plexinA1

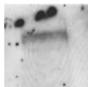

Supplement: mmc2.pdf [file mmc2.pdf]
